# Supplementary material
Source: PubMed Central journal article supplement (PMC3648621)
Supplement: NIHMS389325-supplement-Supp_Appendix_S1.pdf [file NIHMS389325-supplement-Supp_Appendix_S1.pdf]

APPENDIX A: Question Comparability

| <b>Drinking Measure</b>       | <b>CCSS, survivors and siblings</b>                                                                                                                                                                                                                                               | <b>NAS, peer comparisons</b>                                                                                                                                                                                                                                                                                                                                                                                                                                                        |
|-------------------------------|-----------------------------------------------------------------------------------------------------------------------------------------------------------------------------------------------------------------------------------------------------------------------------------|-------------------------------------------------------------------------------------------------------------------------------------------------------------------------------------------------------------------------------------------------------------------------------------------------------------------------------------------------------------------------------------------------------------------------------------------------------------------------------------|
| Any current drinking          | Have you had at least one drink of beer, wine, or liquor during the past year?<br><i>No</i><br><i>Yes</i>                                                                                                                                                                         | <i>See frequency question below. For those who answered, less than once a month, supplementary question:</i><br>Think back over the last year, since (current date last year). Did you have a whole drink of any alcoholic beverage like wine, beer, or liquor in these last twelve months?                                                                                                                                                                                         |
| Usual Daily drinking amount   | On the days that you drink, on average, how many drinks do you usually have?<br><i>No drinks in past 2 years</i><br><i>One drink/day</i><br><i>Two drinks/day</i><br><i>Three drinks/day</i><br><i>Four drinks/day</i><br><i>Five drinks/day</i><br><i>Six or more drinks/day</i> | On the days when you drink alcohol, how many drinks did you have per day ?<br>____ # drinks                                                                                                                                                                                                                                                                                                                                                                                         |
| Frequency of drinking/monthly | During the past 2 years, on the average, how many times per month did you drink the following:<br>Wine, beer and mixed drinks.<br>Response options for each ranged from 0 to 999.                                                                                                 | How often do you usually have any kind of beverage containing alcohol, whether it is wine, beer, whiskey, or any other drink?<br><i>3 or more times/day</i><br><i>Two times/day</i><br><i>Once/day</i><br><i>Nearly every day</i><br><i>3-4 times/week</i><br><i>Once or twice a week</i><br><i>Two or three times a month</i><br><i>Once a month</i><br><i>Less than once a month</i><br><i>Less than once a year</i><br><i>Have you never had any beverage containing alcohol</i> |
| NIAAA Risky Drinking:         | Combines Usual daily drinking and weekly volume. If usual daily drinking is >3/>4 for women/men and weekly drinking is >7/>14 for women/men.                                                                                                                                      | Combines Usual daily drinking with weekly volume limits<br>If usual daily drinking is >3/>4 for women/men and weekly drinking is >7/>14 for women/men.                                                                                                                                                                                                                                                                                                                              |
| Heavy Drinking                | Usual daily drinking that is >5/>6 for women/men                                                                                                                                                                                                                                  | Usual daily drinking that is >5/>6 for women/men                                                                                                                                                                                                                                                                                                                                                                                                                                    |
| Age of first drink            | How old were you when you started drinking?<br>_____ Years old                                                                                                                                                                                                                    | About how old were you when you first started drinking alcoholic beverages, not including small tastes? _____<br>age                                                                                                                                                                                                                                                                                                                                                                |
